# Supplementary material for: Evaluating Performance of Sesame (Sesamum indicumL.) Genotypes in Different Growing Seasons in Northern Ethiopia
Source: Hindawi journal article supplement (doi:10.1155/2019/7804621), 2019-03-03
Supplement: f1 [file 7804621.f1.pdf]

| plot | Trt         | Rep | Location | Year | DF | DM | BPP | PHT   |
|------|-------------|-----|----------|------|----|----|-----|-------|
| 1    | Acc-051-02  | 1   | HUMERA   | 1    | 51 | 96 | 3.4 | 117.2 |
| 2    | Acc-051-02  | 2   | HUMERA   | 1    | 49 | 95 | 3.2 | 115.8 |
| 3    | Acc-051-02  | 3   | HUMERA   | 1    | 52 | 94 | 3.2 | 125   |
| 4    | Acc-051-02  | 1   | HUMERA   | 1    | 51 | 96 | 5.2 | 169.4 |
| 5    | Acc-051-02  | 2   | HUMERA   | 1    | 51 | 92 | 4.6 | 135   |
| 6    | Acc-051-02  | 3   | HUMERA   | 1    | 54 | 94 | 4   | 122.4 |
| 7    | Acc-051-02  | 1   | HUMERA   | 1    | 51 | 96 | 2   | 150.2 |
| 8    | Acc-051-02  | 2   | HUMERA   | 1    | 49 | 94 | 2.6 | 145.6 |
| 9    | Acc-051-02  | 3   | HUMERA   | 1    | 54 | 94 | 3.2 | 138.6 |
| 10   | Acc-051-02  | 1   | HUMERA   | 1    | 48 | 95 | 4.6 | 155.2 |
| 11   | Acc-051-02  | 2   | HUMERA   | 1    | 51 | 96 | 2.8 | 145.2 |
| 12   | Acc-051-02  | 3   | HUMERA   | 1    | 53 | 94 | 3   | 138.8 |
| 13   | Acc-111-84  | 1   | HUMERA   | 1    | 57 | 96 | 3.6 | 140.8 |
| 14   | Acc-111-84  | 2   | HUMERA   | 1    | 55 | 94 | 2.2 | 126.2 |
| 15   | Acc-111-84  | 3   | HUMERA   | 1    | 54 | 93 | 4.4 | 147   |
| 16   | Acc-202-37  | 1   | HUMERA   | 1    | 52 | 95 | 3.6 | 149.2 |
| 17   | Acc-202-37  | 2   | HUMERA   | 1    | 51 | 93 | 4.2 | 155   |
| 18   | Acc-202-37  | 3   | HUMERA   | 1    | 53 | 93 | 4.6 | 163.8 |
| 19   | cross22XT-  | 1   | HUMERA   | 1    | 51 | 95 | 3.4 | 166.2 |
| 20   | cross22XT-  | 2   | HUMERA   | 1    | 50 | 97 | 4   | 154   |
| 21   | cross22XT-  | 3   | HUMERA   | 1    | 53 | 98 | 3.2 | 118.4 |
| 22   | cross22XT-  | 1   | HUMERA   | 1    | 53 | 94 | 3   | 132.2 |
| 23   | cross22XT-  | 2   | HUMERA   | 1    | 54 | 93 | 3.6 | 125.8 |
| 24   | cross22XT-  | 3   | HUMERA   | 1    | 53 | 96 | 4.6 | 144.8 |
| 25   | Hirhir (Loc | 1   | HUMERA   | 1    | 51 | 98 | 4   | 191.2 |
| 26   | Hirhir (Loc | 2   | HUMERA   | 1    | 53 | 92 | 5.2 | 169   |
| 27   | Hirhir (Loc | 3   | HUMERA   | 1    | 53 | 95 | 4.8 | 150.6 |
| 28   | NN-038      | 1   | HUMERA   | 1    | 50 | 95 | 3.8 | 137.2 |
| 29   | NN-038      | 2   | HUMERA   | 1    | 51 | 94 | 4.4 | 179.2 |
| 30   | NN-038      | 3   | HUMERA   | 1    | 51 | 94 | 3.4 | 157.4 |
| 31   | serkamowl   | 1   | HUMERA   | 1    | 51 | 94 | 4   | 165.8 |
| 32   | serkamowl   | 2   | HUMERA   | 1    | 50 | 95 | 4   | 163.2 |
| 33   | serkamowl   | 3   | HUMERA   | 1    | 52 | 94 | 3.8 | 147.6 |
| 34   | Tate        | 1   | HUMERA   | 1    | 53 | 96 | 6   | 123.4 |
| 35   | Tate        | 2   | HUMERA   | 1    | 52 | 96 | 5.6 | 126.4 |
| 36   | Tate        | 3   | HUMERA   | 1    | 53 | 94 | 4.6 | 144   |
| 1    | Acc-051-02  | 1   | HUMERA   | 2    | 39 | 87 | 1.6 | 113.8 |
| 2    | Acc-051-02  | 2   | HUMERA   | 2    | 39 | 87 | 3.6 | 128.8 |
| 3    | Acc-051-02  | 3   | HUMERA   | 2    | 40 | 87 | 2.6 | 125.4 |
| 4    | Acc-051-02  | 1   | HUMERA   | 2    | 42 | 84 | 1.6 | 115   |
| 5    | Acc-051-02  | 2   | HUMERA   | 2    | 42 | 84 | 2.2 | 110.4 |
| 6    | Acc-051-02  | 3   | HUMERA   | 2    | 43 | 84 | 2.2 | 111.4 |
| 7    | Acc-051-02  | 1   | HUMERA   | 2    | 40 | 89 | 2.8 | 133.8 |
| 8    | Acc-051-02  | 2   | HUMERA   | 2    | 40 | 89 | 3.4 | 134.4 |
| 9    | Acc-051-02  | 3   | HUMERA   | 2    | 42 | 89 | 3.2 | 128   |
| 10   | Acc-051-02  | 1   | HUMERA   | 2    | 39 | 87 | 2.8 | 134   |
| 11   | Acc-051-02  | 2   | HUMERA   | 2    | 40 | 84 | 3.2 | 142   |
| 12   | Acc-051-02  | 3   | HUMERA   | 2    | 41 | 84 | 1.8 | 146.2 |
| 13   | Acc-111-84  | 1   | HUMERA   | 2    | 43 | 89 | 2.4 | 130.2 |

|    |                |        |   |    |    |     |       |
|----|----------------|--------|---|----|----|-----|-------|
| 14 | Acc-111-842    | HUMERA | 2 | 42 | 89 | 2.6 | 109.4 |
| 15 | Acc-111-843    | HUMERA | 2 | 43 | 84 | 2.4 | 135   |
| 16 | Acc-202-371    | HUMERA | 2 | 42 | 88 | 2   | 143   |
| 17 | Acc-202-372    | HUMERA | 2 | 41 | 84 | 2.8 | 109.4 |
| 18 | Acc-202-373    | HUMERA | 2 | 42 | 84 | 3   | 127.8 |
| 19 | cross22XT- 1   | HUMERA | 2 | 41 | 84 | 1.6 | 128   |
| 20 | cross22XT- 2   | HUMERA | 2 | 40 | 84 | 2.2 | 135.8 |
| 21 | cross22XT- 3   | HUMERA | 2 | 41 | 84 | 2.2 | 119.8 |
| 22 | cross22XT- 1   | HUMERA | 2 | 43 | 88 | 1.4 | 115.6 |
| 23 | cross22XT- 2   | HUMERA | 2 | 43 | 88 | 1.4 | 138.4 |
| 24 | cross22XT- 3   | HUMERA | 2 | 41 | 88 | 2   | 129   |
| 25 | Hirhir (Loca 1 | HUMERA | 2 | 40 | 83 | 2.4 | 115.8 |
| 26 | Hirhir (Loca 2 | HUMERA | 2 | 40 | 83 | 3   | 117.8 |
| 27 | Hirhir (Loca 3 | HUMERA | 2 | 40 | 83 | 3.2 | 110.8 |
| 28 | NN-038 1       | HUMERA | 2 | 40 | 84 | 1   | 106.2 |
| 29 | NN-038 2       | HUMERA | 2 | 41 | 84 | 1.4 | 112.6 |
| 30 | NN-038 3       | HUMERA | 2 | 42 | 84 | 1.6 | 131.8 |
| 31 | serkamowl 1    | HUMERA | 2 | 41 | 89 | 1.6 | 125.2 |
| 32 | serkamowl 2    | HUMERA | 2 | 41 | 89 | 2.6 | 126.2 |
| 33 | serkamowl 3    | HUMERA | 2 | 43 | 89 | 2.4 | 128.2 |
| 34 | Tate 1         | HUMERA | 2 | 43 | 89 | 2.4 | 116.6 |
| 35 | Tate 2         | HUMERA | 2 | 43 | 89 | 2.6 | 118.2 |
| 36 | Tate 3         | HUMERA | 2 | 43 | 89 | 3   | 128.2 |
| 1  | Acc-051-021    | HUMERA | 3 | 42 | 82 | 2   | 116.8 |
| 2  | Acc-051-022    | HUMERA | 3 | 44 | 82 | 1.4 | 103.4 |
| 3  | Acc-051-023    | HUMERA | 3 | 42 | 82 | 1.6 | 95    |
| 4  | Acc-051-021    | HUMERA | 3 | 43 | 82 | 2   | 88.8  |
| 5  | Acc-051-022    | HUMERA | 3 | 43 | 84 | 2   | 112.4 |
| 6  | Acc-051-023    | HUMERA | 3 | 42 | 82 | 2   | 104   |
| 7  | Acc-051-021    | HUMERA | 3 | 44 | 85 | 2   | 153.2 |
| 8  | Acc-051-022    | HUMERA | 3 | 43 | 85 | 1.4 | 122.8 |
| 9  | Acc-051-023    | HUMERA | 3 | 44 | 85 | 2   | 115   |
| 10 | Acc-051-021    | HUMERA | 3 | 45 | 86 | 2.8 | 135.4 |
| 11 | Acc-051-022    | HUMERA | 3 | 45 | 86 | 3   | 118.6 |
| 12 | Acc-051-023    | HUMERA | 3 | 45 | 86 | 2   | 112.6 |
| 13 | Acc-111-841    | HUMERA | 3 | 48 | 83 | 1.4 | 72.4  |
| 14 | Acc-111-842    | HUMERA | 3 | 44 | 83 | 1.6 | 114.8 |
| 15 | Acc-111-843    | HUMERA | 3 | 45 | 83 | 1   | 109.8 |
| 16 | Acc-202-371    | HUMERA | 3 | 44 | 84 | 2   | 114.4 |
| 17 | Acc-202-372    | HUMERA | 3 | 44 | 84 | 2.4 | 113   |
| 18 | Acc-202-373    | HUMERA | 3 | 45 | 83 | 2.2 | 100   |
| 19 | cross22XT- 1   | HUMERA | 3 | 47 | 83 | 2   | 102.4 |
| 20 | cross22XT- 2   | HUMERA | 3 | 44 | 83 | 2.2 | 119   |
| 21 | cross22XT- 3   | HUMERA | 3 | 47 | 83 | 1.4 | 125.6 |
| 22 | cross22XT- 1   | HUMERA | 3 | 43 | 83 | 1.2 | 123.2 |
| 23 | cross22XT- 2   | HUMERA | 3 | 44 | 82 | 2.2 | 105.8 |
| 24 | cross22XT- 3   | HUMERA | 3 | 47 | 82 | 2.4 | 126   |
| 25 | Hirhir (Loca 1 | HUMERA | 3 | 42 | 82 | 1.6 | 96    |
| 26 | Hirhir (Loca 2 | HUMERA | 3 | 43 | 81 | 2   | 112   |
| 27 | Hirhir (Loca 3 | HUMERA | 3 | 45 | 82 | 1.8 | 104   |

|    |           |   |        |   |    |    |     |       |
|----|-----------|---|--------|---|----|----|-----|-------|
| 28 | NN-038    | 1 | HUMERA | 3 | 43 | 83 | 1.4 | 93.6  |
| 29 | NN-038    | 2 | HUMERA | 3 | 44 | 84 | 2   | 104.8 |
| 30 | NN-038    | 3 | HUMERA | 3 | 45 | 84 | 2.4 | 111.2 |
| 31 | serkamowl | 1 | HUMERA | 3 | 43 | 84 | 2   | 119.6 |
| 32 | serkamowl | 2 | HUMERA | 3 | 44 | 84 | 2   | 113.8 |
| 33 | serkamowl | 3 | HUMERA | 3 | 44 | 84 | 2.2 | 127.8 |
| 34 | Tate      | 1 | HUMERA | 3 | 48 | 83 | 2.2 | 77.4  |
| 35 | Tate      | 2 | HUMERA | 3 | 48 | 83 | 2.6 | 86.6  |
| 36 | Tate      | 3 | HUMERA | 3 | 47 | 83 | 2.4 | 82.2  |

| LPBZ | PPP  | SPP  | TSW | yield (kg/ha) |
|------|------|------|-----|---------------|
| 63.4 | 28.6 | 62.6 | 2.7 | 389.7         |
| 45.6 | 25.6 | 57.5 | 3.1 | 386           |
| 53.4 | 32   | 59.5 | 2.8 | 510.8         |
| 79.2 | 42.6 | 57.4 | 2.8 | 573.6         |
| 31   | 51   | 59.9 | 3.2 | 431.9         |
| 64.4 | 26.8 | 59.8 | 2.9 | 497.4         |
| 41.6 | 37.4 | 58.2 | 3.1 | 562.8         |
| 20.2 | 30.2 | 63.9 | 2.7 | 328.9         |
| 60.6 | 35.4 | 66.2 | 3.1 | 357.6         |
| 67   | 36.4 | 56   | 3   | 553.8         |
| 68.6 | 30.2 | 57.2 | 3   | 501.7         |
| 59   | 35.6 | 61.1 | 3   | 556.6         |
| 45.8 | 30.2 | 54.5 | 2.7 | 266.6         |
| 15   | 25   | 61.7 | 2.6 | 236.1         |
| 50.8 | 25.6 | 58.8 | 2.5 | 460           |
| 51.6 | 38.2 | 61.3 | 3   | 543.7         |
| 83.2 | 41.4 | 60.2 | 2.8 | 649           |
| 63.4 | 43.4 | 62.9 | 2.7 | 540.1         |
| 83.6 | 43   | 57.6 | 2.8 | 334.3         |
| 69.4 | 38.6 | 51   | 2.9 | 538.2         |
| 64.4 | 33.6 | 59   | 2.8 | 343.1         |
| 73.4 | 30.4 | 51.4 | 2.9 | 288.7         |
| 50.6 | 31   | 56.7 | 2.8 | 308.1         |
| 81   | 29.4 | 55.9 | 3   | 356.7         |
| 83.6 | 30.4 | 60.3 | 3.5 | 610.8         |
| 89.4 | 44   | 63.6 | 3   | 748.5         |
| 72.4 | 36.4 | 58.5 | 3   | 679.65        |
| 73.2 | 56.4 | 53.9 | 2.8 | 336.5         |
| 83   | 54.8 | 48.9 | 2.8 | 665.4         |
| 82.2 | 55.4 | 54.8 | 2.7 | 539.3         |
| 72.6 | 30.8 | 54.8 | 3.3 | 748.5         |
| 41.4 | 38.7 | 56.9 | 3.1 | 529.5         |
| 44.2 | 20.8 | 63.3 | 3.2 | 468.6         |
| 65.2 | 35.6 | 57.2 | 2.8 | 569.7         |
| 74.6 | 34.4 | 55.8 | 2.7 | 836.3         |
| 68.2 | 51.6 | 49.7 | 2.6 | 686.7         |
| 48   | 34.8 | 65.8 | 2.7 | 673           |
| 75.2 | 36.2 | 61   | 3.1 | 850.25        |
| 63.8 | 41   | 60.2 | 2.8 | 651.375       |
| 55.4 | 20.6 | 54.4 | 2.8 | 849.375       |
| 64.4 | 42.4 | 63.8 | 3.2 | 974.1875      |
| 52.4 | 28   | 62.2 | 2.9 | 922.5625      |
| 66.8 | 38   | 59.8 | 3.1 | 936.625       |
| 51.4 | 38.2 | 64.6 | 2.7 | 926.5625      |
| 68.8 | 21.2 | 67.4 | 3.1 | 890.125       |
| 73.6 | 43.8 | 49   | 3   | 960.3125      |
| 84.6 | 52.2 | 58   | 3   | 905.6875      |
| 81.4 | 35   | 51   | 3   | 794.5625      |
| 51.8 | 25.2 | 50.8 | 2.7 | 833.5         |

|      |      |      |     |          |
|------|------|------|-----|----------|
| 44.6 | 29.6 | 56.2 | 2.6 | 760.125  |
| 5.8  | 29.2 | 51   | 2.5 | 755.8125 |
| 71.6 | 34.2 | 61.6 | 3   | 837.1875 |
| 58.8 | 37.8 | 56.6 | 2.8 | 867.25   |
| 42.4 | 23.8 | 62   | 2.7 | 766.0625 |
| 59.2 | 38.4 | 57.2 | 2.8 | 656.3125 |
| 63   | 38.8 | 46.6 | 2.9 | 578.125  |
| 57.2 | 30.8 | 58   | 2.8 | 580.75   |
| 30   | 12.2 | 48.4 | 3   | 821.125  |
| 67   | 33.2 | 43   | 2.9 | 856.625  |
| 70.4 | 32.4 | 54   | 2.8 | 878.9375 |
| 66.8 | 36.8 | 63.4 | 2.9 | 1211.875 |
| 62.6 | 36.2 | 69.4 | 3   | 1148.438 |
| 57   | 31.6 | 61.4 | 3   | 1124.125 |
| 53.4 | 29.4 | 50.2 | 2.8 | 693.75   |
| 50.6 | 18.8 | 41.4 | 2.8 | 694.9375 |
| 72   | 29.8 | 57.8 | 2.7 | 868.4375 |
| 61   | 26.4 | 52.6 | 3.3 | 808.4375 |
| 55.2 | 27.8 | 57.4 | 3.1 | 980.3125 |
| 65.8 | 34.6 | 67   | 3.2 | 964.6875 |
| 71.6 | 43.4 | 61.4 | 2.8 | 886.75   |
| 51.8 | 33.4 | 52.8 | 2.7 | 881.75   |
| 50.4 | 36.2 | 40.6 | 2.6 | 782.8125 |
| 33.6 | 23.2 | 58.2 | 2.7 | 464      |
| 32.4 | 13.4 | 67.2 | 2.6 | 597.6416 |
| 32.6 | 10   | 66.6 | 2.5 | 489.2984 |
| 27.2 | 24.2 | 57.2 | 2.9 | 373.5849 |
| 33.6 | 20.6 | 57.8 | 3   | 574.4348 |
| 37.6 | 23   | 55.6 | 3   | 458.8777 |
| 44.6 | 35.6 | 63.4 | 3   | 662.964  |
| 40.2 | 23.6 | 59.8 | 2.9 | 634.2857 |
| 51.6 | 28.8 | 59.4 | 2.8 | 683.4783 |
| 48.2 | 21.2 | 61   | 3   | 588.5217 |
| 44.4 | 25.6 | 63.8 | 2.8 | 455.1016 |
| 37.8 | 27.2 | 63.8 | 2.7 | 677.3617 |
| 21.8 | 8.6  | 56.6 | 3.1 | 553.5135 |
| 30.4 | 17.2 | 63.2 | 2.7 | 413.4737 |
| 32   | 15   | 65   | 3.1 | 562.7907 |
| 33   | 24   | 57.6 | 2.8 | 467.5459 |
| 44.6 | 18.6 | 56.4 | 2.8 | 504.3978 |
| 30.2 | 18.4 | 51.8 | 2.7 | 528.2945 |
| 37.2 | 14.2 | 63   | 3   | 698.2169 |
| 34.8 | 27.4 | 66.4 | 3   | 704.5217 |
| 42.8 | 17   | 61.2 | 3   | 764.8182 |
| 51   | 27.4 | 57   | 3.3 | 523.9407 |
| 33.6 | 25.6 | 56.4 | 3.1 | 539.3882 |
| 54.8 | 22.6 | 59.6 | 3.2 | 508.4932 |
| 63.8 | 33.4 | 58   | 2.8 | 937.2754 |
| 50.6 | 33   | 55.4 | 3   | 814.9721 |
| 69.8 | 34.6 | 60   | 2.8 | 880.9231 |

|      |      |      |     |          |
|------|------|------|-----|----------|
| 35.8 | 12.2 | 59.4 | 3   | 513.4857 |
| 38   | 21.6 | 54   | 3.1 | 670.6182 |
| 55   | 28.6 | 58.8 | 2.8 | 592.0894 |
| 39.6 | 20.2 | 53   | 2.8 | 783.5152 |
| 39   | 18.8 | 58.8 | 2.7 | 786.8936 |
| 40.6 | 26.8 | 58.8 | 2.6 | 737.9091 |
| 29.6 | 21.4 | 60.4 | 2.8 | 418.0513 |
| 21.4 | 18.8 | 56   | 3.2 | 517.3472 |
| 30.4 | 19.2 | 57.4 | 2.9 | 675.7989 |

The abbreviations and their stand is listed below

**DF**: Days to 50% flowering; **DM**: Days to 50% maturity; **BPP**: number of branches per plant; **PH**: Plant height (cm); **PPP**: Pods per plant; **SPP**: Seeds per pod; **LPBZ**: Length of pod bearing zone (cm), **TSW**: Thousand seed weight (gram).

The experiment was conducted for three years in Humera in a randomized complete block design with three replications. 12 advanced lines which come from previous selections were used in the experiment and these advanced lines were tested for three years.

All of the yielded and other agronomic traits were collected from the 12 advanced lines conducted for three years
